# Supplementary material for: LTRharvest, an efficient and flexible software for de novo detection of LTR retrotransposons
Source: PubMed Central journal article supplement (PMC2253517; doi:10.1186/1471-2105-9-18), 2008-01-14
Supplement: 1471-2105-9-18-S1.pdf [file 1471-2105-9-18-S1.pdf]

**Table A: Abbreviations used in Table B and C**

| Abbreviation             | Explanation                                                                                                                                                                                                                                                                                                                                                                                                                                                                                                |
|--------------------------|------------------------------------------------------------------------------------------------------------------------------------------------------------------------------------------------------------------------------------------------------------------------------------------------------------------------------------------------------------------------------------------------------------------------------------------------------------------------------------------------------------|
| parameter set            | It names whose program's default settings were used. (Parameters were adjusted as far as possible.)                                                                                                                                                                                                                                                                                                                                                                                                        |
| Lex                      | Minimal length for maximal repeats.                                                                                                                                                                                                                                                                                                                                                                                                                                                                        |
| Lmin, Lmax               | Minimal and maximal length constraints for LTRs.                                                                                                                                                                                                                                                                                                                                                                                                                                                           |
| Dmin, Dmax               | Minimal and maximal distance constraints for LTRs.                                                                                                                                                                                                                                                                                                                                                                                                                                                         |
| LTR similarity           | Similarity threshold for LTRs.                                                                                                                                                                                                                                                                                                                                                                                                                                                                             |
| LTR motif search         | Search for LTR motifs.                                                                                                                                                                                                                                                                                                                                                                                                                                                                                     |
| LTR motif necessary      | Predictions must have a specified motif.                                                                                                                                                                                                                                                                                                                                                                                                                                                                   |
| TSDs search              | Search for TSDs.                                                                                                                                                                                                                                                                                                                                                                                                                                                                                           |
| TSDs necessary           | Predictions must have TSDs.                                                                                                                                                                                                                                                                                                                                                                                                                                                                                |
| seed extension           | Information about the seed extension parameters.                                                                                                                                                                                                                                                                                                                                                                                                                                                           |
| clustering               | Clustering process of predicted sequences using the <i>Vmatch</i> single linkage clustering program:<br><br><u>parameter name, value, comment</u><br>dbcluster, 95 ((Dmin / Dmax) x 100 + 1) , match covers at least 95% of the smaller and (formula value)%<br>of the larger sequence<br>d, , compute direct matches<br>p, , compute palindromic matches<br>seedlength, 50, minimal length of exact repeats<br>l, Dmin + Lmin, minimal length of matches<br>exdrop, 9, Xdrop score used in seed extension |
| tRNA                     | Use of precompiled tRNA sequences for detection of PBS.                                                                                                                                                                                                                                                                                                                                                                                                                                                    |
| PPT search               | Search for PPT (poly purine tract) using dynamic programming techniques.                                                                                                                                                                                                                                                                                                                                                                                                                                   |
| RT search                | Search for RT (reverse transcriptase) domains using dynamic programming techniques.                                                                                                                                                                                                                                                                                                                                                                                                                        |
| IN, RnaseH search        | Search for IN (integrase), RnaseH domains using dynamic programming techniques.                                                                                                                                                                                                                                                                                                                                                                                                                            |
| generic ORF search       | Search for an open reading frame.                                                                                                                                                                                                                                                                                                                                                                                                                                                                          |
| HMMsearch                | Search for a particular ORF (open reading frame) using RT-, RNaseH-, IN-and Protease-HMMs.                                                                                                                                                                                                                                                                                                                                                                                                                 |
| annotations              | Number of annotated elements in the corresponding benchmark set.                                                                                                                                                                                                                                                                                                                                                                                                                                           |
| Index files construction | Construction time in seconds for all index files, i.e., the enhanced suffix array that is stored on files for the input sequences, only used by <i>LTRharvest</i>                                                                                                                                                                                                                                                                                                                                          |
| run-time                 | Real run-times were determined by the unix program time, except for LTR STRUC where run-times were determined from the log-data files.                                                                                                                                                                                                                                                                                                                                                                     |
| predictions              | Number of predictions made by the program.                                                                                                                                                                                                                                                                                                                                                                                                                                                                 |
| allowed $\pm$ difference | Allowed $\pm$ difference from exact position for categorising a prediction as a true positive.                                                                                                                                                                                                                                                                                                                                                                                                             |
| TP                       | Number of true positives.                                                                                                                                                                                                                                                                                                                                                                                                                                                                                  |
| hTP                      | Half true positives with only one boundary coordinate predicted correctly.                                                                                                                                                                                                                                                                                                                                                                                                                                 |
| Total of TP              | Sum of TP and hTP.                                                                                                                                                                                                                                                                                                                                                                                                                                                                                         |
| FP                       | Number of false positives.                                                                                                                                                                                                                                                                                                                                                                                                                                                                                 |
| FN                       | Number of false negatives.                                                                                                                                                                                                                                                                                                                                                                                                                                                                                 |
| Sensitivity              | Sensitivity of prediction, calculated by $TP/(TP + FN)$                                                                                                                                                                                                                                                                                                                                                                                                                                                    |
| Specificity              | Specificity of prediction, calculated by $TP/(TP + FP)$                                                                                                                                                                                                                                                                                                                                                                                                                                                    |

**Table B: Quality validation on the entire *S. cerevisiae* genome (complete data set).**

Parameters marked by the asterisk '\*' were fixed (not adjustable) in the corresponding tool.

Run-time marked with '\*\*' is for *LTRharvest* + clustering with *Vmatch* with the options given in Table A.

| Program used                 | LTR_STRUC | LTR_seq | LTR_Rho                   | LTR_FINDER | LTR_FINDER | LTRharvest | LTR_seq    | LTR_Rho                      | LTR_FINDER | LTRharvest | LTRharvest | LTRharvest | LTRharvest | LTRharvest |
|------------------------------|-----------|---------|---------------------------|------------|------------|------------|------------|------------------------------|------------|------------|------------|------------|------------|------------|
| Run-number (new)             | 1         | 2       | 3                         | 4-1        | 4-2        | 5          | 6          | 7                            | 8          | 9          | 10         | 11         | 12         | 13         |
| Parameter set                | default*  | default | default                   | default    | default    | default    | see Tab.1  | see Tab.1                    | see Tab.1  | see Tab.1  | LTR_seq    | LTR_Rho    | LTR_FINDER | LTR_FINDER |
| Lex                          | 40*       | 30      | 40                        | 20         | 20         | 30         | 100        | 100                          | 100        | 100        | 30         | 40         | 20         | 20         |
| Lmin                         | ?         | 100     | 1                         | 100        | 100        | 100        | 100        | 100                          | 100        | 100        | 100        | 1          | 100        | 100        |
| Lmax                         | ?         | 2000    | 1000                      | 3500       | 3500       | 1000       | 1000       | 1000                         | 1000       | 1000       | 600        | 1000       | 1000       | 1000       |
| Dmin                         | ?         | 600     | 1100                      | 1000       | 1000       | 1000       | 1500       | 1500                         | 1500       | 1500       | 600        | 1100       | 1000       | 1000       |
| Dmax                         | ?         | 15000   | 16000                     | 20000      | 20000      | 15000      | 15000      | 15000                        | 15000      | 15000      | 15000      | 16000      | 20000      | 20000      |
| LTR similarity               | 70*       | 85      | 80                        | 70         | 70         | 85         | 80         | 80                           | 80         | 80         | 85         | 80         | 70         | 70         |
| LTR motif search             | yes*      | yes     | no*                       | yes*       | yes*       | no         | yes        | no*                          | yes*       | yes        | yes        | no         | no         | no         |
| LTR motif necessary          | no*       | tg.ca   | no*                       | no         | no         | no         | tg.ca      | no*                          | tg.ca      | tg.ca      | tg.ca      | no         | no         | no         |
| TSDs search                  | yes*      | yes     | no*                       | yes*       | yes*       | yes        | yes        | no*                          | yes*       | yes        | yes        | yes        | yes        | yes        |
| TSDs necessary               | no*       | yes     | no*                       | no         | no         | yes        | yes        | no*                          | yes        | yes        | yes        | yes        | yes        | yes        |
| Seed extension               | default*  | default | default*                  | default    | default    | default    | see Tab. 1 | default*                     | default    | see Tab.1  | see Tab.1  | see Tab.1  | see Tab.1  | see Tab.1  |
| Clustering                   | no*       | no*     | no*                       | no*        | no*        | no*        | no*        | no*                          | no*        | no         | no*        | yes        | no         | yes        |
| tRNA                         | yes*      | no*     | no*                       | yes        | no         | no*        | no*        | no*                          | no         | no*        | no*        | no*        | no*        | no*        |
| PPT search                   | yes*      | no*     | no*                       | yes*       | yes*       | no*        | no*        | no*                          | yes*       | no*        | no*        | no*        | no*        | no*        |
| RT search                    | yes*      | no*     | no*                       | yes*       | yes*       | no*        | no*        | no*                          | yes*       | no*        | no*        | no*        | no*        | no*        |
| IN, RnaseH search            | no*       | no*     | no*                       | no         | no         | no*        | no*        | no*                          | no         | no*        | no*        | no*        | no*        | no*        |
| Generic ORF search           | yes*      | no*     | yes*                      | no*        | no*        | no*        | no*        | yes*                         | no*        | no*        | no*        | no*        | no*        | no*        |
| HMMsearch                    | no*       | no*     | yes*                      | no*        | no*        | no*        | no*        | yes*                         | no*        | no*        | no*        | no*        | no*        | no*        |
| <b>Results</b>               |           |         |                           |            |            |            |            |                              |            |            |            |            |            |            |
| Index files construction [s] | -         | -       | -                         | -          | -          | 8          | -          | -                            | -          | 8          | 8          | 8          | 8          | 8          |
| Run-time [s]                 | ~ 600     | 413     | 190                       | 19         | 19         | 3          | 126        | 168                          | 19         | 2          | 3          | 10**       | 3          | 13**       |
| Allowed +-difference         | 20        | 20      | 20                        | 20         | 20         | 20         | 20         | 20                           | 20         | 20         | 20         | 20         | 20         | 20         |
| Predictions                  | 39        | 50      | 46                        | 56         | 48         | 68         | 38         | 38                           | 43         | 45         | 50         | 50         | 81         | 50         |
| Annotations [full length]    | 50        | 50      | 47                        | 50         | 50         | 50         | 50         | 46                           | 50         | 50         | 50         | 50         | 50         | 50         |
| TP                           | 38        | 40      | 39                        | 50         | 44         | 47         | 37         | 23                           | 42         | 45         | 45         | 46         | 47         | 43         |
| hTP                          | 0         | 0       | 3                         | 0          | 0          | 2          | 0          | 9                            | 0          | 0          | 0          | 2          | 2          | 2          |
| Total of TP + hTP            | 38        | 40      | 42                        | 50         | 44         | 49         | 37         | 32                           | 42         | 45         | 45         | 48         | 49         | 45         |
| FP                           | 1         | 0       | 4                         | 6          | 4          | 19         | 1          | 6                            | 1          | 0          | 5          | 2          | 32         | 5          |
| FN                           | 12        | 10      | 5                         | 0          | 6          | 1          | 13         | 14                           | 8          | 5          | 5          | 2          | 1          | 5          |
| Sensitivity                  | 76%       | 80.0%   | 89.4%                     | 100%       | 88.0%      | 98.0%      | 74.0%      | 69.6%                        | 84.0%      | 90.0%      | 90.0%      | 96.0%      | 98.0%      | 90.0%      |
| Specificity                  | 97.4%     | 100.0%  | 91.3%                     | 89.3%      | 91.7%      | 72.1%      | 97.4%      | 84.2%                        | 97.7%      | 100%       | 90.0%      | 96.0%      | 60.5%      | 90.0%      |
| Comment                      |           |         | program error<br>chr03,06 |            |            |            |            | program error<br>chr03,06,09 |            |            |            |            |            |            |

**Table C: Quality validation on the entire *D. melanogaster* genome (complete data set).**

Parameters marked by the asterisk '\*' were fixed (not adjustable) or not available in the corresponding tool.

Run-time marked with '\*\*' is for *LTRharvest* + clustering with *Vmatch* with the options given in Table A. Settings marked by '?' are not given in the manual.

| Program used                     | LTR_STRUC | LTR_seq | LTR_Rho  | LTR_FINDER | LTR_FINDER | LTRharvest | LTRharvest | LTR_seq    | LTR_Rho   | LTR_FINDER | LTRharvest | LTRharvest     | LTRharvest | LTRharvest |            |
|----------------------------------|-----------|---------|----------|------------|------------|------------|------------|------------|-----------|------------|------------|----------------|------------|------------|------------|
| Run-number (new)                 | 1         | 2       | 3        | 4-1        | 4-2        | 5-1        | 5-2        | 6          | 7         | 8          | 9          | 10             | 11         | 12         | 13         |
| Parameter set                    | default*  | default | default  | default    | default    | default    | default    | see Tab.1  | see Tab.1 | see Tab.1  | see Tab.1  | <i>LTR_seq</i> | LTR_Rho    | LTR_FINDER | LTR_FINDER |
| <i>Lex</i>                       | 40*       | 30      | 40       | 20         | 20         | 30         | 30         | 76         | 76        | 76         | 76         | 30             | 40         | 20         | 20         |
| <i>Lmin</i>                      | ?         | 100     | 1        | 100        | 100        | 100        | 100        | 116        | 116       | 116        | 116        | 100            | 1          | 100        | 100        |
| <i>Lmax</i>                      | ?         | 2000    | 1000     | 3500       | 3500       | 1000       | 1000       | 800        | 800       | 800        | 800        | 200            | 1000       | 1000       | 1000       |
| <i>Dmin</i>                      | ?         | 600     | 1100     | 1000       | 1000       | 1000       | 1000       | 2280       | 2280      | 2280       | 2280       | 600            | 1100       | 1000       | 1000       |
| <i>Dmax</i>                      | ?         | 15000   | 16000    | 20000      | 20000      | 15000      | 15000      | 8773       | 8773      | 8773       | 8773       | 15000          | 16000      | 20000      | 20000      |
| LTR similarity                   | 70*       | 85      | 80       | 70         | 70         | 85         | 85         | 91         | 91        | 91         | 91         | 85             | 80         | 70         | 70         |
| LTR motif search                 | yes*      | no      | no*      | yes*       | yes*       | no         | no         | no         | no*       | yes*       | no         | no             | no         | no         | no         |
| LTR motif necessary              | no*       | no      | no*      | no         | no         | no         | no         | no         | no*       | no         | no         | no             | no         | no         | no         |
| TSDs search                      | yes*      | yes     | no*      | yes*       | yes*       | yes        | yes        | yes        | no*       | yes*       | yes        | yes            | yes        | yes        | yes        |
| TSDs necessary                   | no*       | yes     | no*      | no         | no         | yes        | yes        | yes        | no*       | no         | yes        | yes            | yes        | yes        | yes        |
| Seed extension                   | default*  | default | default* | default    | default    | default    | default    | see Tab. 1 | default*  | default    | see Tab.1  | see Tab.1      | see Tab.1  | see Tab.1  | see Tab.1  |
| Clustering                       | no*       | no*     | no*      | no*        | no*        | no*        | yes        | no*        | no*       | no*        | yes        | no*            | yes        | no         | yes        |
| tRNA                             | yes*      | no*     | no*      | yes        | no         | no*        | no*        | no*        | yes       | no*        | no*        | no*            | no*        | no*        | no*        |
| PPT search                       | yes*      | no*     | no*      | yes*       | yes*       | no*        | no*        | no*        | no*       | yes*       | no*        | no*            | no*        | no*        | no*        |
| RT search                        | yes*      | no*     | no*      | yes*       | yes*       | no*        | no*        | no*        | no*       | yes*       | no*        | no*            | no*        | no*        | no*        |
| IN, RNaseH search                | no*       | no*     | no*      | no         | no         | no*        | no*        | no*        | no*       | no         | no*        | no*            | no*        | no*        | no*        |
| Generic ORF search               | yes*      | no*     | yes*     | no*        | no*        | no*        | no*        | no*        | yes*      | no*        | no*        | no*            | no*        | no*        | no*        |
| HMMsearch                        | no*       | no*     | yes*     | no*        | no*        | no*        | no*        | no*        | yes*      | no*        | no*        | no*            | no*        | no*        | no*        |
| <b>Results</b>                   |           |         |          |            |            |            |            |            |           |            |            |                |            |            |            |
| Index files construction [s]     | -         | -       | -        | -          | -          | 138        | 138        |            | -         | -          | 138        | 138            | 138        | 138        | 138        |
| Run-time [s]                     | 4380      | 24120   | 2286     | 1209       | 1208       | 25         | 198**      | 1380       | 1709      | 320        | 170**      | 49             | 196**      | 45         | 298**      |
| Allowed +-difference             | 20        | 20      | 20       | 20         | 20         | 20         | 20         | 20         | 20        | 20         | 20         | 20             | 20         | 20         | 20         |
| Predictions                      | 310       | 188     | 417      | 395        | 278        | 723        | 490        | 160        | 398       | 204        | 411        | 768            | 484        | 987        | 519        |
| <b>Annotations [full-length]</b> |           |         |          |            |            |            |            |            |           |            |            |                |            |            |            |
| TP                               | 112       | 109     | 204      | 214        | 183        | 283        | 282        | 105        | 198       | 152        | 277        | 279            | 275        | 275        | 273        |
| hTP                              | 2         | 3       | 84       | 12         | 7          | 15         | 14         | 2          | 94        | 6          | 20         | 13             | 20         | 21         | 21         |
| Total of TP + hTP                | 114       | 112     | 288      | 226        | 190        | 298        | 296        | 107        | 292       | 158        | 297        | 292            | 295        | 296        | 294        |
| FP                               | 196       | 76      | 129      | 169        | 88         | 425        | 194        | 53         | 106       | 46         | 114        | 476            | 189        | 691        | 225        |
| FN                               | 190       | 192     | 16       | 78         | 114        | 6          | 8          | 197        | 12        | 146        | 7          | 12             | 9          | 8          | 10         |
| Sensitivity                      | 37.5%     | 36.8%   | 94.7%    | 74.3%      | 62.5%      | 98.0%      | 97.4%      | 35.2%      | 96.1%     | 52.0%      | 97.7%      | 96.1%          | 97.0%      | 97.4%      | 96.7%      |
| Specificity                      | 36.8%     | 59.6%   | 69.1%    | 57.2%      | 68.3%      | 41.2%      | 60.4%      | 66.9%      | 73.4%     | 77.5%      | 72.3%      | 38.0%          | 61.0%      | 30.0%      | 56.6%      |
| <b>Annotations [all]</b>         |           |         |          |            |            |            |            |            |           |            |            |                |            |            |            |
| TP                               | 129       | 139     | 255      | 270        | 223        | 364        | 360        | 125        | 244       | 182        | 343        | 360            | 349        | 352        | 347        |
| hTP                              | 8         | 11      | 113      | 43         | 28         | 38         | 35         | 10         | 121       | 14         | 41         | 37             | 47         | 51         | 49         |
| Total of TP + hTP                | 137       | 150     | 368      | 313        | 251        | 402        | 395        | 135        | 365       | 196        | 384        | 397            | 396        | 403        | 396        |
| FP                               | 173       | 38      | 49       | 82         | 27         | 321        | 95         | 25         | 33        | 8          | 27         | 371            | 88         | 584        | 123        |
| FN                               | 545       | 532     | 314      | 369        | 431        | 280        | 287        | 547        | 317       | 486        | 298        | 285            | 286        | 279        | 286        |
| Sensitivity                      | 20.1%     | 22.0%   | 54.0%    | 45.9%      | 36.8%      | 58.9%      | 57.9%      | 19.8%      | 53.5%     | 28.7%      | 56.3%      | 58.2%          | 58.1%      | 59.1%      | 58.1%      |
| Specificity                      | 44.2%     | 79.8%   | 88.2%    | 79.2%      | 90.3%      | 55.6%      | 80.6%      | 84.4%      | 91.7%     | 96.1%      | 93.4%      | 51.7%          | 81.8%      | 40.8%      | 76.3%      |
